# Supplementary material
Source: publisher site journal article supplement (https://www.dovepress.com/article/423687)
Supplement: Supplementary file 1 [file get_supplementary_file.php]

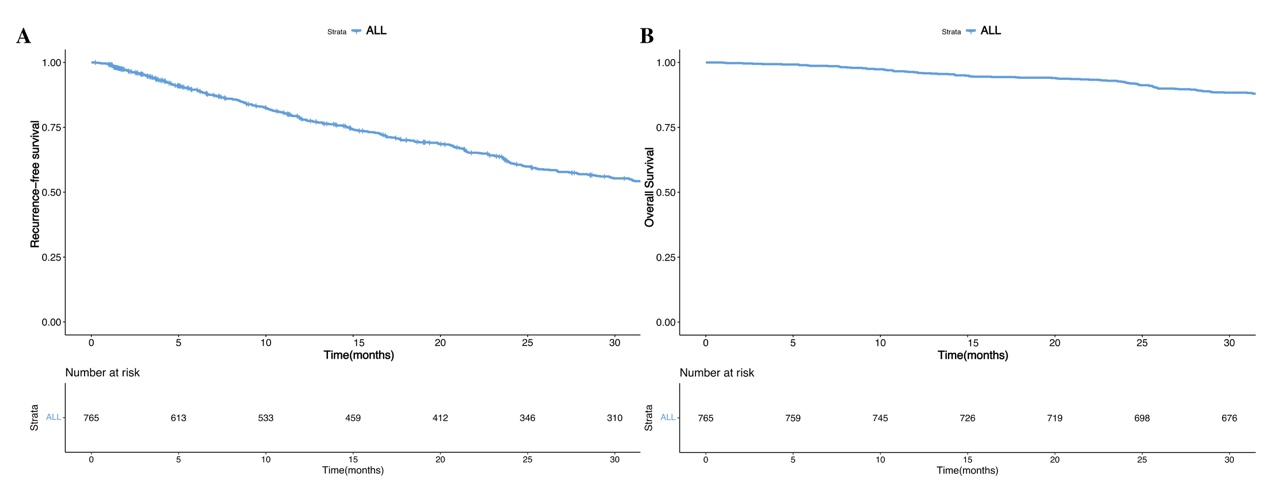


**Supplementary figure 1.** The Kaplan-Meier (K-M) survival curves for recurrence (A) and death (B) in the whole cohort.


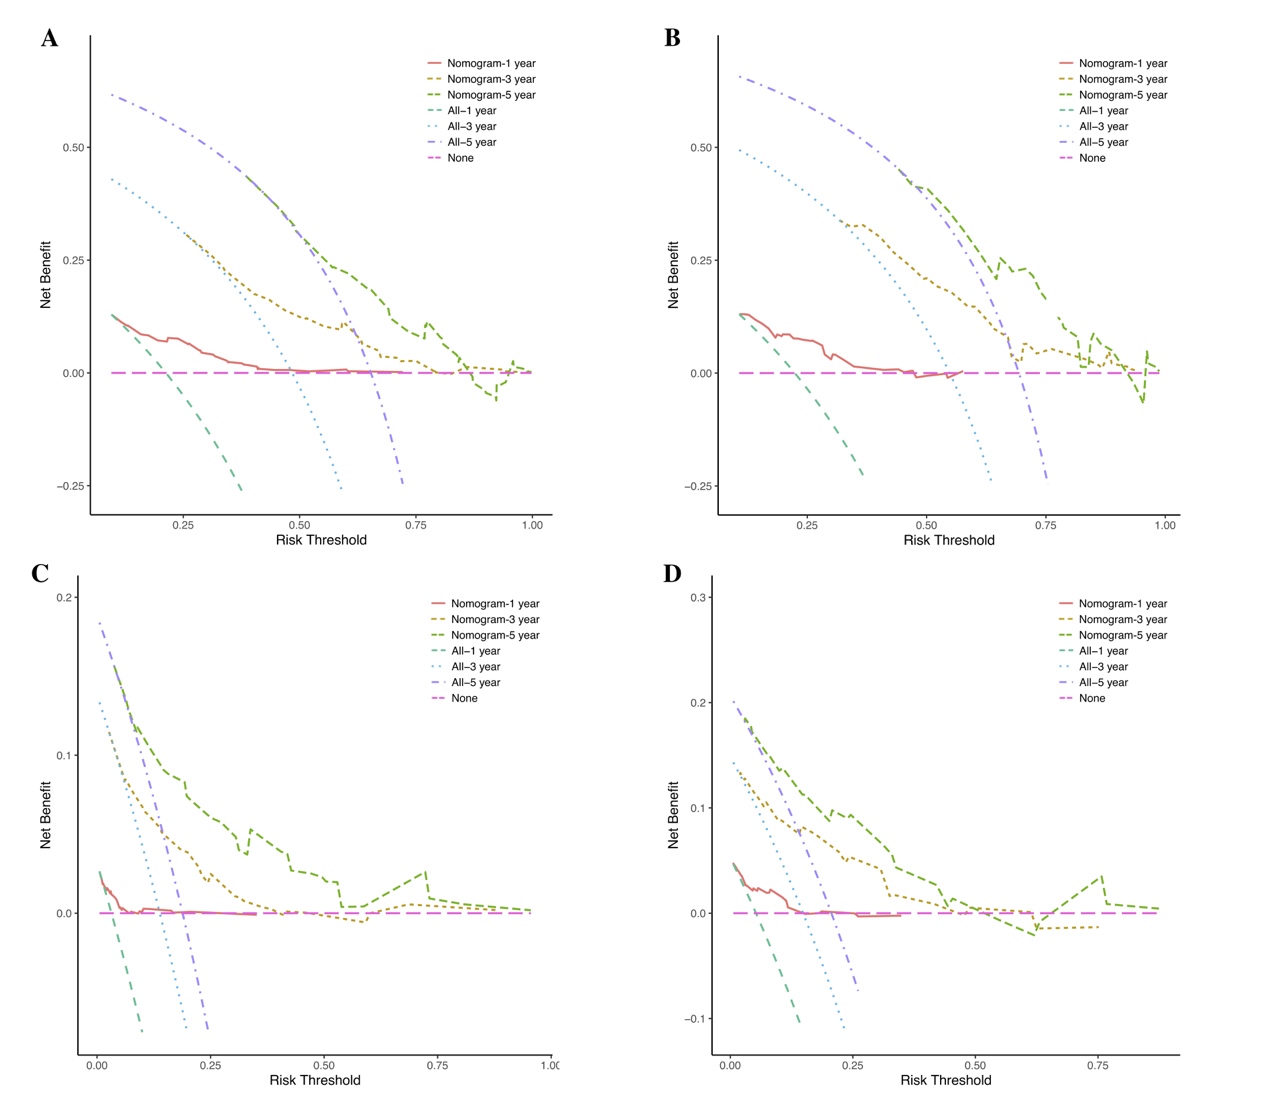


**Supplementary figure 2.** Decision curve analyses (DCA) curves of 1-, 3-, 5-year of recurrence-free survival (RFS) in the training (A) and validation (B) cohorts, and the DCA curves of overall survival (OS) in the training (C) and validation (D) cohorts.


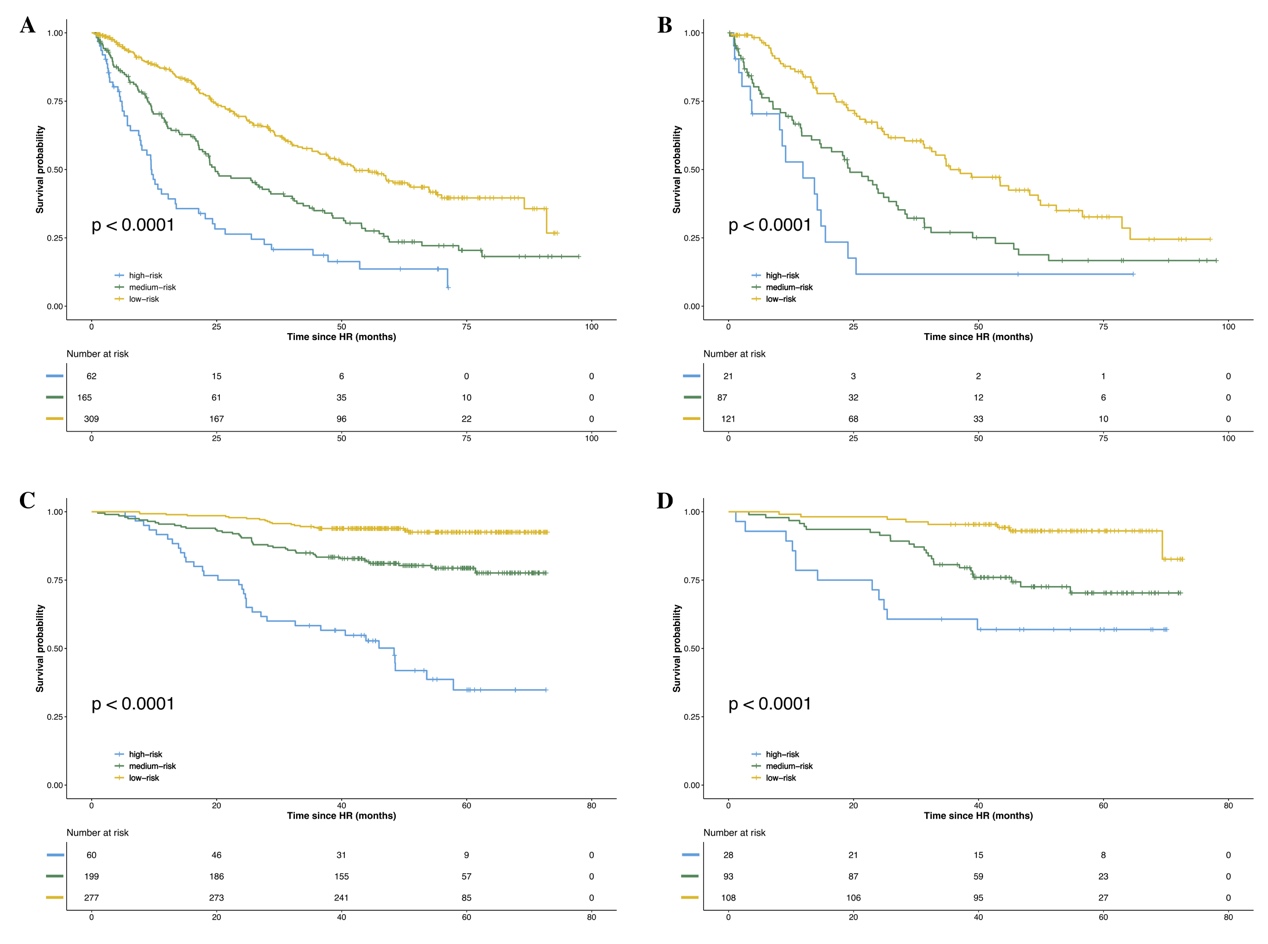


**Supplementary figure 3.** The Kaplan-Meier (K-M) survival curves for patients with different risks for recurrence in the training (A) and validation (B) cohorts, and the K-M survival curves for patients with different risks for death in the training (C) and validation (D) cohorts.
